# Supplementary material for: Magic sized ZnS quantum dots as a highly sensitive and selective fluorescence sensor probe for Ag+ions
Source: Royal Society of Chemistry journal article supplement (doi:10.1039/c1an15653e), 2011-12-12
Supplement: c1an15653e.pdf [file c1an15653e.pdf]

## Magic sized ZnS quantum dots as a highly sensitive and selective fluorescence sensor probe for $\text{Ag}^+$ ion†

Abhijit Mandal, Anirban Dandapat and Goutam De\*

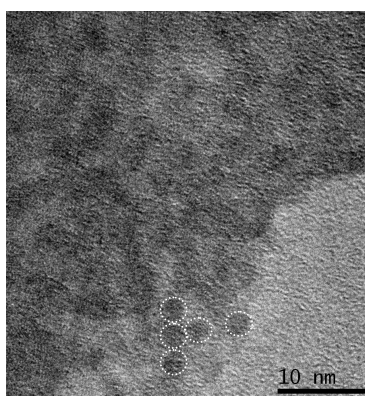

**Fig. S1** Bright field TEM image of 0.5 h refluxed TLA-ZnS QDs. Some clusters are encircled.

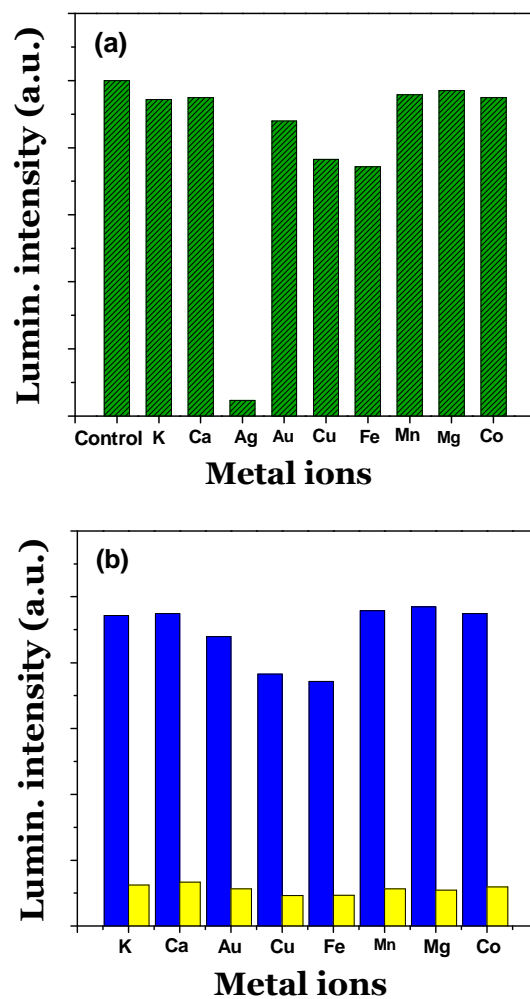

**Fig. S2** (a) Effect of different metal ions on the PL intensity of as-prepared (0 h) TLA capped ZnS QDs. Concentrations of  $\text{Ag}^+$  ion: 0.5  $\mu\text{M}$ ; other ions: 100  $\mu\text{M}$ . (b) Responses of PL intensities in the absence (blue) and presence (yellow) of 0.5  $\mu\text{M}$   $\text{Ag}^+$  solution containing specific interfering metal ions of 100  $\mu\text{M}$ .

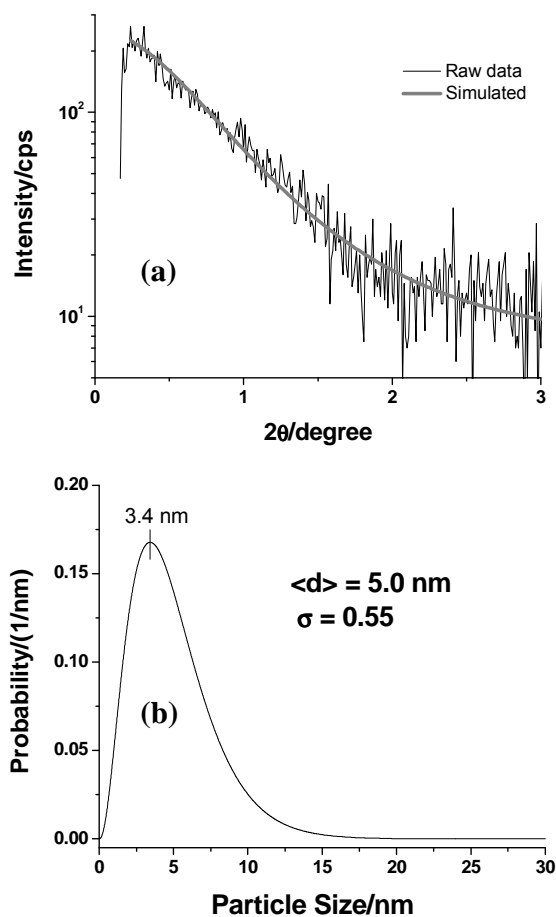

**Fig. S3** (a) Transmission SAXS analysis of 0.5 h refluxed TLA–ZnS QDs after addition of  $\text{Ag}^+$  ion and (b) the corresponding particle size distributions. The average diameter ( $\langle d \rangle$ ) and dispersion ( $\sigma$ ) of the distribution are indicated in the figure.
